# Supplementary material for: Removal of Chromium(VI) by Nanoscale Zero-Valent Iron Supported on Melamine Carbon Foam
Source: MDPI journal article supplement (doi:10.3390/nano12111866), 2022-05-30
Supplement: s1 [file s1]

# Removal of Chromium(VI) by Nanoscale Zero-Valent Iron Supported on Melamine Carbon Foam

Qiming Li <sup>1,†</sup>, Meili Liu <sup>1,†</sup>, Xuchun Qiu <sup>1</sup>, Xiang Liu <sup>2</sup>, Malcom Frimpong Dapaah <sup>1</sup>, Qijian Niu <sup>3,\*</sup>  
and Liang Cheng <sup>1,4,5,\*</sup>

- <sup>1</sup> School of Environment and Safety Engineering, Jiangsu University, Zhenjiang 212013, China; jingtian19941106@163.com (Q.L.); liumeili202110525@163.com (M.L.); xuchunqiu@gmail.com (X.Q.); 5103200301@stmail.ujs.edu.cn (M.F.D.)
- <sup>2</sup> Institute of Medicine & Chemical Engineering, Zhenjiang College, Zhenjiang 212000, China; liuxiang0222@126.com
- <sup>3</sup> School of Agricultural Engineering, Jiangsu University, Zhenjiang 212013, China
- <sup>4</sup> School of Civil and Mechanical Engineering, Curtin University, Perth, WA 6102, Australia
- <sup>5</sup> Institute of Materials Engineering, Nanjing University, Nantong 226000, China
- \* Correspondence: niuqijian@ujs.edu.cn (Q.N.); clcheng@ujs.edu.cn (L.C.)
- † These authors contributed equally to this work.

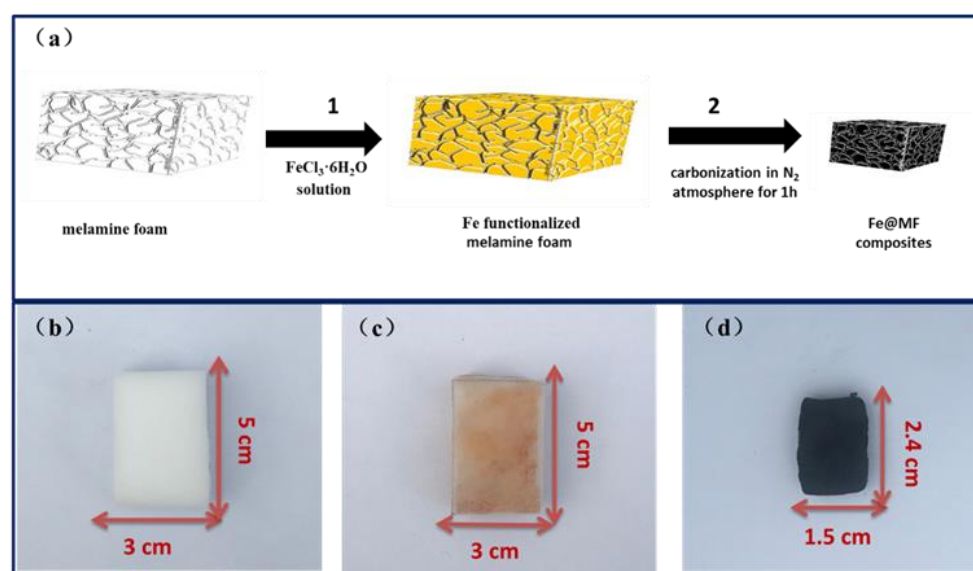

**Figure S1.** (a) The synthesis process of Fe@MF (using Fe@MF-12.5-800 as an example); (b–d) photos of Fe@MF at different stages.

**Table S1.** The content (wt. %) of each element tested by XPS and EDS.

| Element | XPS                 |       | EDS                 |
|---------|---------------------|-------|---------------------|
|         | Mass Percentage (%) | Error | Mass Percentage (%) |
| Fe      | 16.22               | 1.66  | 14.13               |
| C       | 60.11               | 1.73  | 55.16               |
| N       | 5.76                | 0.91  | 6.08                |
| O       | 17.82               | 1.00  | 24.13               |
| Cr      | 0.09                | 1.22  | 0                   |

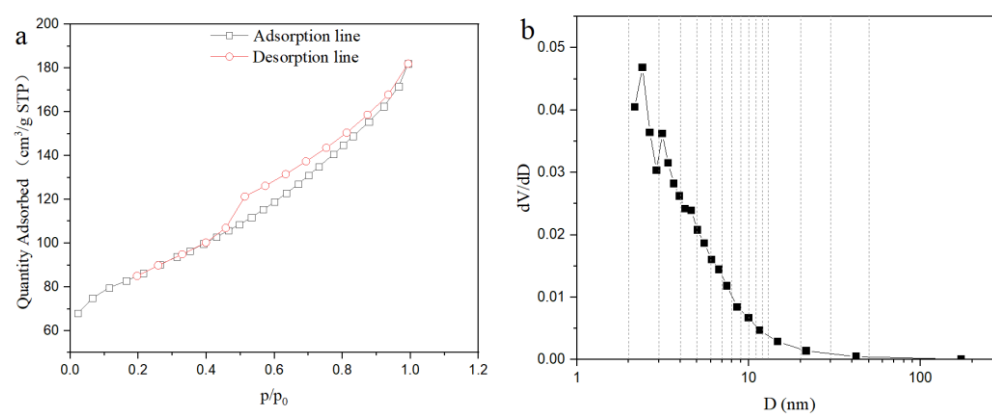

**Figure S2.** (a) N<sub>2</sub> adsorption-desorption isotherms and (b) pore size distributions of Fe@MF-12.5-800.
